# Supplementary material for: RORα controls inflammatory state of human macrophages
Source: PubMed Central journal article supplement (PMC6261595; doi:10.1371/journal.pone.0207374), 2018-11-28
Supplement: pone.0207374.s001.pdf [file pone.0207374.s001.pdf]

S2 Figure:

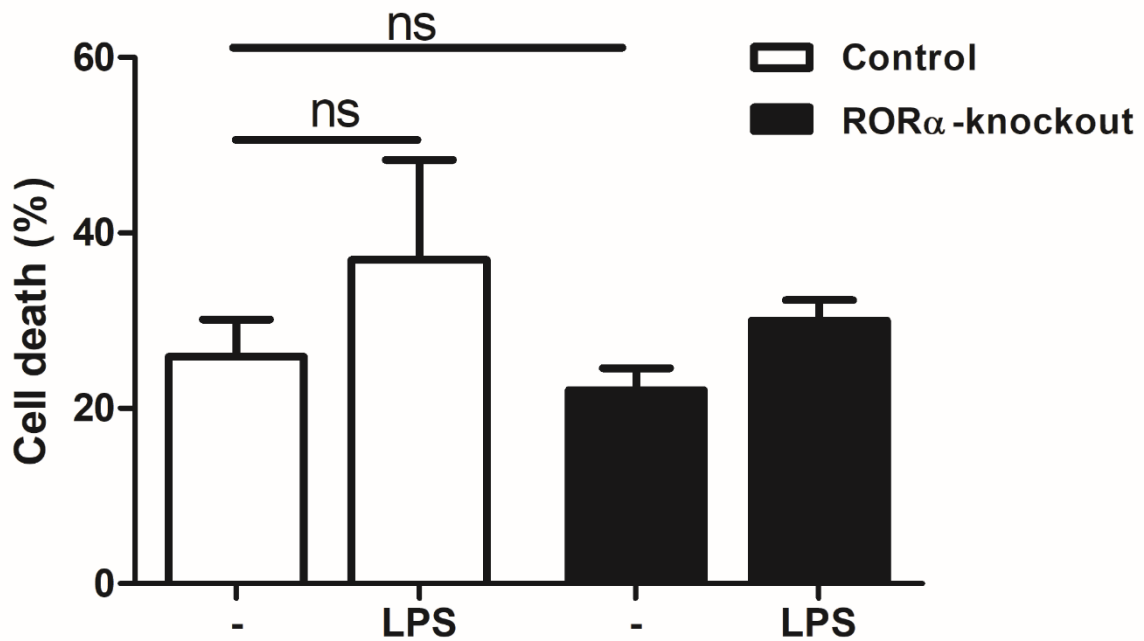

**S2 Fig. *RORA*-KO cells show similar viability to control cells.** Both control and deletion cell lines had a comparable rate of cell death over 24 hours period of time as measured by LDH release assay.  $10^5$  cells in 96-well plates were differentiated using 50 ng/ml PMA for 48 hours. Stimulation was performed with 100 ng/ml LPS for 24 hours. Supernatant of unstimulated and LPS-stimulated cells were collected and subjected to LDH release assay.

### S3 Figure:

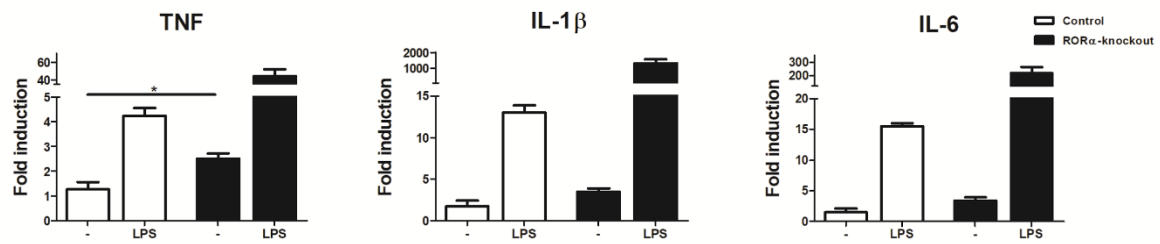

**S3 Fig. Expression of inflammatory genes in undifferentiated *ROR*-KO cells.**  $2.5 \times 10^5$  cells in 24-well plates were stimulated with 10 ng/ml LPS for 4 hours. Pro-inflammatory cytokine expression levels were determined using qRT-PCR. Graphs are representatives for at least three independent experiments.

S4 Figure:

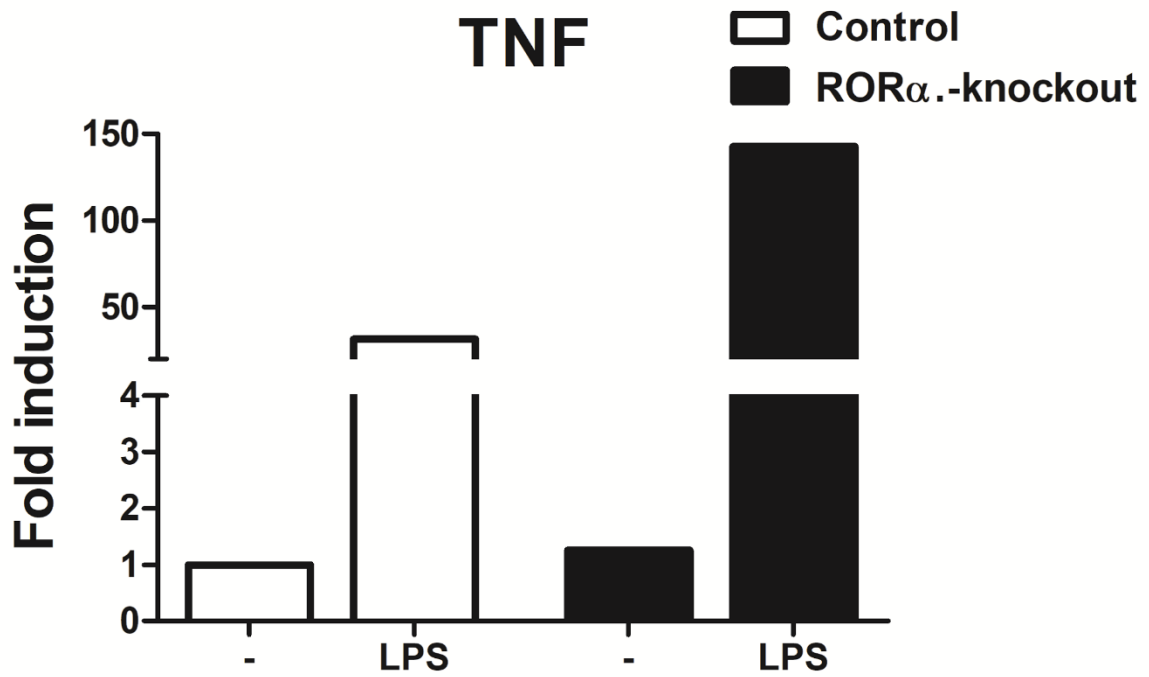

S4 Fig. *TNF* expression is increased in THP-1 cell population transduced with *RORA* sgRNA lentiCRISPRV2 construct.
