# Supplementary material for: RORα controls inflammatory state of human macrophages
Source: PubMed Central journal article supplement (PMC6261595; doi:10.1371/journal.pone.0207374), 2018-11-28
Supplement: pone.0207374.s002.pdf [file pone.0207374.s002.pdf]

**S1 Table. RNASeq Data quality summary**

| <b>Sample</b> | <b>Raw Reads</b> | <b>Clean Reads</b> | <b>Raw Base(G)</b> | <b>Clean Base(G)</b> | <b>Effective Rate(%)</b> | <b>Error Rate(%)</b> | <b>Q20(%)</b> | <b>Q30(%)</b> | <b>GC Content(%)</b> |
|---------------|------------------|--------------------|--------------------|----------------------|--------------------------|----------------------|---------------|---------------|----------------------|
| Renilla1      | 30865152         | 30259274           | 9.3                | 9.1                  | 98.04                    | 0.01                 | 97.11         | 92.91         | 53.27                |
| Renilla2      | 29215228         | 28541024           | 8.8                | 8.6                  | 97.69                    | 0.01                 | 97.07         | 92.83         | 53.91                |
| RoRa1         | 26523101         | 25765191           | 8.0                | 7.7                  | 97.14                    | 0.01                 | 97.46         | 93.66         | 52.94                |
| RoRa2         | 27732053         | 27353567           | 8.3                | 8.2                  | 98.64                    | 0.01                 | 97.08         | 92.85         | 53.62                |

**S2 Table. List of genes differentially expressed in differentiated *RORA*-deleted THP-1 cells**  
364 differentially expressed genes grouped according to the direction of changes and sorted by the t value

| Gene       | logFC | AveExpr | t     | P.Value  | adj.P.Val |
|------------|-------|---------|-------|----------|-----------|
| TNF        | 4.11  | 6.7754  | 32.82 | 7.30E-10 | 1.04E-05  |
| MMP1       | 2.94  | 7.4368  | 24.93 | 5.88E-09 | 2.77E-05  |
| CXCL1      | 3.95  | 5.3925  | 24.06 | 7.82E-09 | 2.77E-05  |
| GIMAP8     | 2.86  | 7.0602  | 22.12 | 1.46E-08 | 3.01E-05  |
| IL1B       | 2.25  | 11.748  | 19.06 | 4.53E-08 | 8.03E-05  |
| FCAMR      | 4.45  | 3.6814  | 18.3  | 6.33E-08 | 8.16E-05  |
| CCL3L1     | 2.89  | 6.0085  | 18.25 | 6.31E-08 | 8.16E-05  |
| ANO8       | 2.71  | 7.1796  | 17.71 | 7.88E-08 | 9.24E-05  |
| SRC        | 2.69  | 6.737   | 17.27 | 9.55E-08 | 9.24E-05  |
| CCL5       | 2.2   | 8.5712  | 17.12 | 1.02E-07 | 9.24E-05  |
| SOCS3      | 5.63  | 2.6873  | 16.28 | 1.58E-07 | 0.00013   |
| IL23A      | 5.24  | 2.8044  | 16.03 | 1.76E-07 | 0.00013   |
| SLC43A2    | 2.55  | 5.6425  | 15.98 | 1.71E-07 | 0.00013   |
| RRAD       | 2.54  | 5.6183  | 15.01 | 2.74E-07 | 0.00018   |
| MMP12      | 4.04  | 3.3013  | 14.6  | 3.44E-07 | 0.0002    |
| CXCL8      | 2.44  | 9.8427  | 14.55 | 3.45E-07 | 0.0002    |
| CXCL3      | 3.28  | 4.6141  | 14.55 | 3.49E-07 | 0.0002    |
| DLL4       | 3.1   | 4.6097  | 14.04 | 4.53E-07 | 0.00023   |
| IGFBP5     | 3.37  | 3.5561  | 13.93 | 4.82E-07 | 0.00023   |
| CLEC5A     | 2.32  | 5.8277  | 13.44 | 6.26E-07 | 0.00027   |
| CCL3       | 2.11  | 7.9598  | 13.13 | 7.43E-07 | 0.0003    |
| TBX2       | 3.67  | 3.5867  | 13.12 | 7.55E-07 | 0.0003    |
| IGSF6      | 3.13  | 3.6038  | 12.79 | 9.05E-07 | 0.00034   |
| MGAT4C     | 4.68  | 2.7007  | 12.36 | 1.21E-06 | 0.00042   |
| PLVAP      | 3.46  | 4.2472  | 12.27 | 1.24E-06 | 0.00042   |
| TLR8       | 3.65  | 3.2149  | 12.14 | 1.35E-06 | 0.00044   |
| LST1       | 1.92  | 7.0373  | 12.01 | 1.43E-06 | 0.00046   |
| BCAR1      | 2.01  | 7.2131  | 11.8  | 1.63E-06 | 0.0005    |
| PLAU       | 2.23  | 6.4015  | 11.75 | 1.69E-06 | 0.0005    |
| CCL4       | 2.21  | 5.3422  | 11.74 | 1.69E-06 | 0.0005    |
| CXCL2      | 3.94  | 2.8946  | 11.68 | 1.80E-06 | 0.00051   |
| CDC42EP2   | 2.91  | 3.4647  | 11.46 | 2.04E-06 | 0.00056   |
| RGS16      | 1.76  | 8.8896  | 11.29 | 2.26E-06 | 0.00059   |
| S100A9     | 2.22  | 5.0796  | 11.02 | 2.70E-06 | 0.00066   |
| NRG1       | 1.85  | 7.2189  | 10.97 | 2.79E-06 | 0.00067   |
| ECE1       | 3.49  | 3.5996  | 10.85 | 3.05E-06 | 0.00072   |
| FP565260.3 | 2.37  | 5.5301  | 10.75 | 3.23E-06 | 0.00075   |
| BCL11A     | 3.57  | 2.8148  | 10.73 | 3.32E-06 | 0.00076   |
| CCL3L3     | 2.89  | 4.1014  | 10.66 | 3.44E-06 | 0.00077   |
| TFPI2      | 2.18  | 7.3403  | 10.56 | 3.69E-06 | 0.00081   |

| Gene     | logFC | AveExpr | t      | P.Value  | adj.P.Val |
|----------|-------|---------|--------|----------|-----------|
| RGCC     | -2.94 | 7.40173 | -24.13 | 7.55E-09 | 2.77E-05  |
| APOE     | -2.66 | 8.23535 | -22.27 | 1.39E-08 | 3.01E-05  |
| ATP9A    | -3.36 | 5.57759 | -22.1  | 1.48E-08 | 3.01E-05  |
| ATF3     | -3.2  | 5.1938  | -18.67 | 5.31E-08 | 8.16E-05  |
| PITPNM1  | -3.14 | 5.97267 | -17.52 | 8.62E-08 | 9.24E-05  |
| ITGA3    | -2.76 | 6.60015 | -17.07 | 1.04E-07 | 9.24E-05  |
| NRGN     | -2.21 | 9.06169 | -15.25 | 2.43E-07 | 0.00017   |
| CD84     | -3.06 | 4.88836 | -14.98 | 2.79E-07 | 0.00018   |
| COL9A2   | -2.4  | 7.16614 | -14.37 | 3.79E-07 | 0.00021   |
| ATP6V1C2 | -4.51 | 3.14635 | -14.01 | 4.74E-07 | 0.00023   |
| SELENON  | -2.08 | 7.87809 | -13.97 | 4.68E-07 | 0.00023   |
| ADRA2B   | -5.07 | 2.50615 | -13.81 | 5.36E-07 | 0.00025   |
| TSC22D1  | -2.29 | 7.54702 | -13.58 | 5.78E-07 | 0.00026   |
| CCDC88B  | -2.96 | 4.85105 | -13.25 | 6.95E-07 | 0.00029   |
| COL4A1   | -2.84 | 4.12875 | -12.95 | 8.26E-07 | 0.00032   |
| DLX3     | -5.63 | 2.0064  | -12.38 | 1.23E-06 | 0.00042   |
| EGR2     | -2.48 | 5.99973 | -12.37 | 1.15E-06 | 0.00042   |
| COL4A2   | -2.6  | 5.57505 | -11.78 | 1.66E-06 | 0.0005    |
| SIAE     | -1.96 | 6.66154 | -11.65 | 1.80E-06 | 0.00051   |
| ITPKB    | -2.35 | 5.48545 | -11.44 | 2.05E-06 | 0.00056   |
| VSIG2    | -2.88 | 3.6101  | -11.33 | 2.21E-06 | 0.00059   |
| APOC1    | -2.15 | 5.86775 | -11.26 | 2.31E-06 | 0.00059   |
| GPC4     | -1.97 | 7.18018 | -11.25 | 2.31E-06 | 0.00059   |
| SLC7A8   | -2.11 | 7.1764  | -11.16 | 2.45E-06 | 0.00061   |
| LPL      | -1.99 | 9.41021 | -10.61 | 3.57E-06 | 0.00079   |
| ATP1B1   | -2.33 | 4.4206  | -10.28 | 4.48E-06 | 0.00093   |
| FAM135B  | -3.11 | 2.90962 | -10.24 | 4.64E-06 | 0.00094   |
| CD36     | -2.34 | 7.26452 | -10.24 | 4.61E-06 | 0.00094   |
| HLA-F    | -5.95 | 1.67045 | -10.23 | 5.00E-06 | 0.00097   |
| CDK18    | -3.15 | 2.87876 | -10.22 | 4.70E-06 | 0.00094   |
| KLHL4    | -4.09 | 2.01203 | -10.19 | 4.88E-06 | 0.00096   |
| MMP7     | -3.24 | 3.02242 | -10.04 | 5.36E-06 | 0.001     |
| CRABP2   | -6.29 | 0.81109 | -9.949 | 6.20E-06 | 0.00107   |
| MYRF     | -2.25 | 4.46978 | -9.879 | 5.97E-06 | 0.00107   |
| SUSD3    | -3.67 | 2.68752 | -9.775 | 6.54E-06 | 0.00112   |
| SCD      | -1.73 | 7.2992  | -9.53  | 7.72E-06 | 0.00126   |
| TRPM8    | -2.86 | 4.678   | -9.521 | 7.81E-06 | 0.00126   |
| IL2RG    | -4.92 | 1.20355 | -9.505 | 8.25E-06 | 0.00129   |
| NES      | -2.19 | 4.86899 | -9.504 | 7.88E-06 | 0.00126   |
| CUX2     | -3.56 | 2.51371 | -9.344 | 9.02E-06 | 0.00137   |

|            |      |        |       |          |         |
|------------|------|--------|-------|----------|---------|
| TREM1      | 2.96 | 3.1002 | 10.35 | 4.29E-06 | 0.00092 |
| S100B      | 4.18 | 1.757  | 10.33 | 4.42E-06 | 0.00093 |
| TNFAIP6    | 3.31 | 2.5925 | 10.12 | 5.04E-06 | 0.00097 |
| NOS2       | 2.88 | 3.2613 | 10.08 | 5.16E-06 | 0.00098 |
| IL6        | 7.09 | -2.184 | 10    | 6.12E-06 | 0.00107 |
| AREG       | 2.44 | 5.9935 | 10    | 5.46E-06 | 0.00101 |
| C1orf21    | 2.13 | 6.05   | 9.859 | 6.05E-06 | 0.00107 |
| CCL4L2     | 2.66 | 3.6748 | 9.848 | 6.11E-06 | 0.00107 |
| SLC7A11    | 2.34 | 5.4075 | 9.674 | 6.94E-06 | 0.00117 |
| SERPINE1   | 1.99 | 5.9174 | 9.609 | 7.28E-06 | 0.00122 |
| C1QTNF1    | 6.49 | 0.0604 | 9.588 | 8.15E-06 | 0.00129 |
| TNFAIP2    | 2.05 | 6.5529 | 9.559 | 7.56E-06 | 0.00125 |
| MYCL       | 1.96 | 6.595  | 9.303 | 9.18E-06 | 0.00137 |
| ORM1       | 3.12 | 2.6001 | 9.285 | 9.37E-06 | 0.00139 |
| EREG       | 3.28 | 3.509  | 9.261 | 9.57E-06 | 0.0014  |
| UNC5B      | 2.07 | 5.9401 | 9.212 | 9.85E-06 | 0.00141 |
| APCDD1     | 3.62 | 1.9566 | 9.187 | 1.02E-05 | 0.00145 |
| GFPT2      | 3.11 | 2.4055 | 9.14  | 1.05E-05 | 0.00146 |
| HSPA1A     | 2.05 | 5.1202 | 9.038 | 1.13E-05 | 0.00156 |
| LAMP3      | 6.68 | 0.5757 | 9.008 | 1.28E-05 | 0.00167 |
| IGSF8      | 1.95 | 6.3841 | 8.974 | 1.19E-05 | 0.00162 |
| SH3BP5     | 1.91 | 5.612  | 8.913 | 1.25E-05 | 0.00167 |
| CSF2       | 7.4  | -1.244 | 8.896 | 1.44E-05 | 0.00182 |
| EHD1       | 2.11 | 8.8284 | 8.883 | 1.28E-05 | 0.00167 |
| OSM        | 2.88 | 2.5985 | 8.852 | 1.31E-05 | 0.0017  |
| DMRT2      | 2.62 | 3.2257 | 8.752 | 1.42E-05 | 0.00182 |
| MAS1       | 3.94 | 1.4062 | 8.723 | 1.48E-05 | 0.00183 |
| PDZD4      | 3.45 | 2.7252 | 8.674 | 1.53E-05 | 0.00185 |
| EGR1       | 1.85 | 6.1766 | 8.627 | 1.57E-05 | 0.00189 |
| TRAF1      | 1.75 | 6.4884 | 8.585 | 1.62E-05 | 0.00192 |
| DTX4       | 1.93 | 6.029  | 8.529 | 1.70E-05 | 0.002   |
| C22orf42   | 2.57 | 3.333  | 8.464 | 1.80E-05 | 0.00208 |
| STK26      | 1.96 | 5.3967 | 8.431 | 1.85E-05 | 0.0021  |
| SIGLEC17P  | 2.02 | 4.9142 | 8.419 | 1.86E-05 | 0.0021  |
| SH3PXD2B   | 1.7  | 6.4687 | 8.409 | 1.88E-05 | 0.0021  |
| AC106865.1 | 2.87 | 2.4808 | 8.39  | 1.92E-05 | 0.00213 |
| BMP8A      | 2.55 | 3.6027 | 8.292 | 2.08E-05 | 0.00229 |
| PTGS2      | 3.14 | 3.2668 | 8.18  | 2.30E-05 | 0.00246 |
| CLDN1      | 3.36 | 1.7224 | 8.18  | 2.31E-05 | 0.00246 |
| OR2F1      | 6.53 | 0.5893 | 8.159 | 2.58E-05 | 0.00265 |
| FJX1       | 2.28 | 4.4186 | 8.11  | 2.43E-05 | 0.00257 |
| PID1       | 2.17 | 4.0145 | 8.095 | 2.46E-05 | 0.00258 |
| ATP6V0D2   | 2.08 | 4.7736 | 8.085 | 2.48E-05 | 0.00258 |
| F3         | 2.51 | 4.5356 | 8.067 | 2.52E-05 | 0.00261 |

|              |       |          |        |          |         |
|--------------|-------|----------|--------|----------|---------|
| ELK1         | -2.7  | 3.35602  | -9.342 | 8.94E-06 | 0.00137 |
| HSD3B7       | -3.12 | 2.83636  | -9.323 | 9.11E-06 | 0.00137 |
| CHODL        | -3.55 | 2.31872  | -9.253 | 9.67E-06 | 0.0014  |
| FN1          | -1.59 | 10.0277  | -9.148 | 1.04E-05 | 0.00145 |
| SLCO2B1      | -1.99 | 6.52249  | -8.947 | 1.21E-05 | 0.00164 |
| SPRY2        | -1.67 | 7.35353  | -8.879 | 1.28E-05 | 0.00167 |
| MYL1         | -6.58 | -2.29424 | -8.841 | 1.46E-05 | 0.00182 |
| RUBCNL       | -2.65 | 4.12709  | -8.72  | 1.46E-05 | 0.00182 |
| LIPA         | -1.74 | 8.17777  | -8.684 | 1.50E-05 | 0.00183 |
| FBLIM1       | -2.74 | 3.52957  | -8.604 | 1.61E-05 | 0.00191 |
| NR2F1        | -3.17 | 2.83549  | -8.499 | 1.76E-05 | 0.00205 |
| ESAM         | -2.71 | 3.00602  | -8.426 | 1.86E-05 | 0.0021  |
| CORO2B       | -2.63 | 3.51804  | -8.276 | 2.11E-05 | 0.0023  |
| KCNH4        | -2.45 | 3.61062  | -8.223 | 2.20E-05 | 0.00239 |
| RHPN1        | -2.02 | 4.5077   | -7.992 | 2.69E-05 | 0.00274 |
| ANKRD10      | -1.98 | 4.87616  | -7.948 | 2.79E-05 | 0.00281 |
| PTGDS        | -4.81 | 1.02654  | -7.902 | 3.04E-05 | 0.00296 |
| ZNF219       | -2.05 | 4.34782  | -7.865 | 3.00E-05 | 0.00294 |
| GIPC3        | -1.82 | 5.07167  | -7.82  | 3.12E-05 | 0.003   |
| CARNS1       | -3.05 | 2.39695  | -7.781 | 3.26E-05 | 0.00308 |
| SEL1L3       | -2.22 | 4.14779  | -7.746 | 3.34E-05 | 0.00314 |
| MAP3K7CL     | -2.27 | 4.09945  | -7.711 | 3.45E-05 | 0.00322 |
| NPHP3-ACAD11 | -5.8  | -2.68178 | -7.613 | 4.07E-05 | 0.00371 |
| DOP1B        | -1.63 | 6.4959   | -7.607 | 3.78E-05 | 0.00351 |
| BCAN         | -3.41 | 2.60203  | -7.593 | 3.88E-05 | 0.00355 |
| LGI2         | -1.85 | 5.33032  | -7.579 | 3.88E-05 | 0.00355 |
| CAPN11       | -5.75 | -2.70619 | -7.422 | 4.85E-05 | 0.00425 |
| CD300LB      | -3.15 | 1.86064  | -7.393 | 4.64E-05 | 0.00414 |
| CACNA1A      | -1.85 | 5.23764  | -7.362 | 4.74E-05 | 0.0042  |
| SPSB1        | -1.72 | 5.59642  | -7.229 | 5.37E-05 | 0.00462 |
| GSG1L        | -4.66 | 1.68789  | -7.157 | 6.01E-05 | 0.00504 |
| SORL1        | -1.83 | 4.93877  | -7.156 | 5.75E-05 | 0.00486 |
| HCN2         | -2.62 | 2.94209  | -6.99  | 6.76E-05 | 0.00558 |
| METTL7B      | -2.49 | 2.99412  | -6.972 | 6.88E-05 | 0.00564 |
| CYP19A1      | -1.9  | 5.93753  | -6.919 | 7.23E-05 | 0.00589 |
| SYP          | -2.93 | 1.80167  | -6.9   | 7.41E-05 | 0.00595 |
| DDIT4L       | -1.67 | 7.15228  | -6.827 | 7.91E-05 | 0.00627 |
| HMX3         | -5.64 | -1.97126 | -6.788 | 8.89E-05 | 0.00671 |
| MAN1C1       | -1.89 | 5.03809  | -6.776 | 8.32E-05 | 0.00643 |
| FAM53B       | -1.88 | 4.34049  | -6.773 | 8.34E-05 | 0.00643 |
| CAMK2B       | -3    | 1.67984  | -6.76  | 8.51E-05 | 0.00649 |
| ISM1         | -3.24 | 1.69836  | -6.74  | 8.71E-05 | 0.00661 |
| DOCK6        | -1.98 | 4.68298  | -6.641 | 9.52E-05 | 0.00707 |
| CHI3L1       | -1.36 | 11.8176  | -6.572 | 0.000102 | 0.0075  |

|          |      |        |       |          |         |
|----------|------|--------|-------|----------|---------|
| SERPINB7 | 5.36 | 0.3441 | 7.994 | 2.86E-05 | 0.00284 |
| IL1A     | 3.15 | 2.3636 | 7.965 | 2.77E-05 | 0.00281 |
| CCDC30   | 1.95 | 4.411  | 7.923 | 2.85E-05 | 0.00284 |
| GPR82    | 2.89 | 2.4741 | 7.875 | 2.99E-05 | 0.00294 |
| VEGFC    | 1.79 | 5.4151 | 7.839 | 3.07E-05 | 0.00296 |
| BHLHE40  | 1.63 | 6.3985 | 7.787 | 3.22E-05 | 0.00306 |
| ADAM19   | 3.68 | 2.039  | 7.418 | 4.58E-05 | 0.00411 |
| IRAK2    | 1.64 | 6.1113 | 7.41  | 4.53E-05 | 0.00409 |
| NLRP2    | 2.29 | 3.2568 | 7.337 | 4.85E-05 | 0.00425 |
| HBEGF    | 1.58 | 7.8641 | 7.314 | 4.95E-05 | 0.00431 |
| SNAI1    | 2.11 | 3.6865 | 7.299 | 5.02E-05 | 0.00435 |
| PLAT     | 5.3  | -0.708 | 7.225 | 5.75E-05 | 0.00486 |
| MYO10    | 1.71 | 6.8822 | 7.215 | 5.44E-05 | 0.00465 |
| NCF1C    | 1.73 | 6.1076 | 7.083 | 6.17E-05 | 0.00515 |
| ICOSLG   | 1.8  | 6.8253 | 6.991 | 6.74E-05 | 0.00558 |
| MYO1B    | 1.75 | 6.3046 | 6.894 | 7.40E-05 | 0.00595 |
| CACNA1E  | 2.41 | 6.3475 | 6.893 | 7.42E-05 | 0.00595 |
| STC1     | 2.34 | 4.7799 | 6.859 | 7.68E-05 | 0.00612 |
| SLC16A10 | 2.7  | 2.0189 | 6.819 | 8.00E-05 | 0.00628 |
| LPXN     | 1.49 | 7.845  | 6.815 | 8.00E-05 | 0.00628 |
| WNT5B    | 1.93 | 4.9603 | 6.806 | 8.08E-05 | 0.0063  |
| PPFIA2   | 2.09 | 4.1249 | 6.756 | 8.48E-05 | 0.00649 |
| CALML5   | 5.52 | -2.969 | 6.73  | 9.38E-05 | 0.00701 |
| GABRG1   | 3.43 | 0.8843 | 6.687 | 9.22E-05 | 0.00692 |
| ADGRE3   | 5.24 | -1.032 | 6.642 | 0.000102 | 0.0075  |
| IER3     | 1.46 | 7.6376 | 6.506 | 0.000109 | 0.00794 |
| S100A8   | 3.14 | 1.3973 | 6.479 | 0.000113 | 0.00816 |
| HS3ST1   | 2.35 | 4.724  | 6.452 | 0.000116 | 0.00824 |
| GPR141   | 3.33 | 0.9905 | 6.422 | 0.00012  | 0.00855 |
| DSEL     | 3.79 | 0.6036 | 6.41  | 0.000123 | 0.00865 |
| PLPP1    | 2.88 | 2.2634 | 6.32  | 0.000133 | 0.00918 |
| NCF1     | 1.52 | 8.0807 | 6.301 | 0.000135 | 0.00918 |
| HMOX1    | 1.44 | 7.8093 | 6.283 | 0.000138 | 0.00929 |
| MCTP2    | 4    | -0.077 | 6.238 | 0.000148 | 0.00987 |
| BIRC3    | 1.92 | 4.0866 | 6.182 | 0.000153 | 0.01014 |
| GTPBP3   | 1.77 | 5.6071 | 6.127 | 0.000162 | 0.01061 |
| CRLF2    | 5.09 | -3.184 | 6.121 | 0.000174 | 0.01111 |
| SAMSN1   | 2.25 | 2.6846 | 6.092 | 0.000168 | 0.01088 |
| SLC12A7  | 1.88 | 5.427  | 6.091 | 0.000169 | 0.01088 |
| PMP22    | 3.25 | 0.7937 | 6.085 | 0.000172 | 0.01102 |
| NCF1B    | 1.74 | 4.6078 | 6.041 | 0.000178 | 0.01126 |
| GPR68    | 1.6  | 7.814  | 6.029 | 0.00018  | 0.01136 |
| ISG20    | 2.18 | 3.5499 | 6.024 | 0.000181 | 0.01138 |
| COL1A1   | 2.3  | 2.5262 | 6.018 | 0.000183 | 0.01141 |
| KCNN3    | 3.53 | 0.1825 | 5.917 | 0.000207 | 0.01272 |

|            |       |          |        |          |         |
|------------|-------|----------|--------|----------|---------|
| MAPK13     | -1.96 | 4.2381   | -6.542 | 0.000105 | 0.0077  |
| PLCB2      | -1.6  | 7.28941  | -6.474 | 0.000113 | 0.00816 |
| LRRC4B     | -3.14 | 2.47049  | -6.471 | 0.000114 | 0.00819 |
| STAC2      | -2.93 | 1.52976  | -6.401 | 0.000122 | 0.00864 |
| CXorf57    | -4.58 | 1.67132  | -6.389 | 0.000129 | 0.009   |
| IGHD       | -5.52 | -1.98366 | -6.38  | 0.000134 | 0.00918 |
| ACTA1      | -5.7  | -0.45411 | -6.356 | 0.000139 | 0.00932 |
| MAGED1     | -3.33 | 0.82168  | -6.333 | 0.000132 | 0.00918 |
| FABP4      | -1.81 | 6.90621  | -6.303 | 0.000135 | 0.00918 |
| SLC37A1    | -2    | 3.65256  | -6.299 | 0.000135 | 0.00918 |
| LSP1       | -2.09 | 4.20574  | -6.255 | 0.000142 | 0.00949 |
| MAP4K2     | -2.16 | 2.87614  | -6.164 | 0.000156 | 0.0103  |
| RB1        | -1.56 | 6.05068  | -6.145 | 0.000159 | 0.01045 |
| OR7E47P    | -5.17 | -3.00189 | -6.108 | 0.000177 | 0.01125 |
| PTPRN2     | -1.84 | 4.0833   | -6.09  | 0.000169 | 0.01088 |
| AC244260.1 | -5.07 | -3.04655 | -6.051 | 0.000187 | 0.01167 |
| PRSS36     | -2.01 | 4.05973  | -5.979 | 0.00019  | 0.01178 |
| SDC3       | -1.7  | 6.33596  | -5.89  | 0.00021  | 0.01282 |
| KANK2      | -1.78 | 5.48133  | -5.843 | 0.000221 | 0.01333 |
| SHMT1      | -2.63 | 1.6524   | -5.82  | 0.000227 | 0.0136  |
| BEX5       | -4.88 | -3.14179 | -5.812 | 0.000242 | 0.01417 |
| AL645935.2 | -4.84 | -3.16044 | -5.808 | 0.000243 | 0.01417 |
| ATP13A2    | -1.6  | 5.53458  | -5.785 | 0.000235 | 0.01401 |
| TMPRSS9    | -3.12 | 0.99853  | -5.724 | 0.000254 | 0.01467 |
| GBGT1      | -1.99 | 3.20426  | -5.718 | 0.000254 | 0.01467 |
| PPARG      | -1.69 | 5.13031  | -5.701 | 0.000258 | 0.01483 |
| LAMP1      | -1.42 | 7.44504  | -5.682 | 0.000264 | 0.01504 |
| TLN2       | -2.34 | 3.15496  | -5.667 | 0.000269 | 0.01526 |
| SLC49A3    | -2.12 | 2.92392  | -5.629 | 0.00028  | 0.01578 |
| P2RX7      | -3.33 | 0.86234  | -5.604 | 0.000292 | 0.01627 |
| AZU1       | -1.72 | 5.88835  | -5.593 | 0.000292 | 0.01627 |
| MAF        | -1.73 | 5.31392  | -5.588 | 0.000294 | 0.01627 |
| NUAK1      | -2.94 | 1.2211   | -5.576 | 0.0003   | 0.01654 |
| PGAM2      | -4.79 | -3.18325 | -5.551 | 0.000324 | 0.01754 |
| SH2D3C     | -2.34 | 3.60184  | -5.537 | 0.000312 | 0.01701 |
| KCNQ1      | -2.03 | 4.95741  | -5.525 | 0.000315 | 0.01715 |
| MTCO2P25   | -4.74 | -3.20887 | -5.511 | 0.000338 | 0.01818 |
| PCDH1      | -3.2  | 0.64595  | -5.494 | 0.00033  | 0.01782 |
| KRT17P2    | -4.91 | -2.28729 | -5.464 | 0.000359 | 0.01903 |
| GNG7       | -2.24 | 2.31544  | -5.445 | 0.000346 | 0.01852 |
| F11R       | -1.61 | 5.11692  | -5.427 | 0.000353 | 0.01875 |
| DYSF       | -2.81 | 1.36307  | -5.36  | 0.000384 | 0.02013 |
| MYH1       | -4.6  | -3.28299 | -5.355 | 0.000404 | 0.02089 |
| WIPF3      | -1.63 | 5.40791  | -5.353 | 0.000385 | 0.02013 |
| AL591806.3 | -1.71 | 4.14731  | -5.35  | 0.000386 | 0.02013 |

|            |      |        |       |          |         |
|------------|------|--------|-------|----------|---------|
| CXCL6      | 2.89 | 1.7452 | 5.916 | 0.000205 | 0.01265 |
| EVA1A      | 2.69 | 1.6256 | 5.887 | 0.000211 | 0.01285 |
| SDC1       | 1.72 | 4.8215 | 5.875 | 0.000213 | 0.01291 |
| IGSF10     | 5.03 | -2.664 | 5.839 | 0.000236 | 0.01401 |
| TFAP2C     | 2.29 | 2.4868 | 5.837 | 0.000222 | 0.01337 |
| SV2C       | 5.33 | -0.742 | 5.827 | 0.000242 | 0.01417 |
| ROBO1      | 1.56 | 6.4463 | 5.771 | 0.000239 | 0.01413 |
| ERBB3      | 5.33 | -1.17  | 5.754 | 0.000262 | 0.01501 |
| COL5A3     | 1.91 | 3.6397 | 5.724 | 0.000252 | 0.01464 |
| AP006222.1 | 2.72 | 1.5938 | 5.641 | 0.000278 | 0.0157  |
| IGDCC4     | 2.78 | 1.1749 | 5.627 | 0.000282 | 0.01583 |
| SOD2       | 1.36 | 9.2023 | 5.549 | 0.000307 | 0.01686 |
| OTULINL    | 1.66 | 4.4762 | 5.539 | 0.00031  | 0.01699 |
| MAP1LC3C   | 2.51 | 1.6438 | 5.435 | 0.00035  | 0.0187  |
| AC140134.1 | 4.74 | -3.358 | 5.403 | 0.000384 | 0.02013 |
| CCL19      | 4.67 | -3.396 | 5.354 | 0.000405 | 0.02089 |
| DLL1       | 2.24 | 3.2249 | 5.238 | 0.00044  | 0.02228 |
| NPFFR2     | 2.27 | 2.3065 | 5.178 | 0.000473 | 0.02358 |
| MFSD2A     | 1.34 | 9.638  | 5.176 | 0.000474 | 0.02358 |
| EVX1       | 4.27 | -0.944 | 5.095 | 0.000544 | 0.02607 |
| S100A3     | 2.25 | 1.9263 | 5.01  | 0.000579 | 0.02757 |
| MEIKIN     | 2.58 | 1.1098 | 5.009 | 0.000581 | 0.02757 |
| CD1A       | 1.77 | 3.3651 | 4.949 | 0.000623 | 0.02916 |
| ORM2       | 2.83 | 0.719  | 4.945 | 0.000631 | 0.02943 |
| EPHB3      | 2.34 | 2.6798 | 4.913 | 0.000653 | 0.03026 |
| EFNA5      | 2.53 | 2.4814 | 4.893 | 0.000669 | 0.03084 |
| PCDH18     | 2.72 | 2.2116 | 4.872 | 0.000688 | 0.03161 |
| ROBO4      | 1.79 | 6.2465 | 4.852 | 0.000702 | 0.03215 |
| MMP13      | 2.94 | 0.3214 | 4.844 | 0.000715 | 0.03256 |
| ROR2       | 1.85 | 3.3261 | 4.769 | 0.000778 | 0.03461 |
| AL592429.1 | 1.9  | 2.7883 | 4.765 | 0.000782 | 0.03468 |
| TNFSF10    | 2.83 | 0.5784 | 4.737 | 0.000816 | 0.03596 |
| CTTNBP2    | 3.06 | 0.5303 | 4.706 | 0.000851 | 0.03717 |
| RIPOR2     | 2.85 | 0.6275 | 4.676 | 0.000881 | 0.03825 |
| AC131206.1 | 2.12 | 2.1081 | 4.65  | 0.000904 | 0.03901 |
| GPR157     | 2.35 | 3.0758 | 4.641 | 0.000917 | 0.03942 |
| PRR32      | 2.17 | 2.0239 | 4.6   | 0.000964 | 0.04096 |
| HS3ST3A1   | 1.46 | 6.3314 | 4.595 | 0.000969 | 0.04105 |
| SIGLEC7    | 1.54 | 4.6585 | 4.552 | 0.001024 | 0.04252 |
| FGF2       | 1.82 | 4.7574 | 4.55  | 0.001026 | 0.04252 |
| TBX15      | 2.38 | 1.2293 | 4.524 | 0.001064 | 0.04365 |
| CPXM1      | 1.99 | 2.1905 | 4.484 | 0.001118 | 0.04506 |
| MARCKSL1   | 1.31 | 9.6327 | 4.471 | 0.001137 | 0.04569 |
| C1orf61    | 4.37 | -1.328 | 4.469 | 0.001199 | 0.047   |
| EHF        | 3.01 | 0.6452 | 4.461 | 0.001165 | 0.04616 |

|            |       |          |        |          |         |
|------------|-------|----------|--------|----------|---------|
| KALRN      | -4.15 | -0.35602 | -5.331 | 0.000409 | 0.02094 |
| FADS2      | -1.67 | 4.92164  | -5.331 | 0.000394 | 0.0205  |
| CHIT1      | -3.23 | 1.64592  | -5.302 | 0.000414 | 0.02103 |
| NR1H3      | -1.57 | 5.21588  | -5.301 | 0.000408 | 0.02094 |
| COL11A2    | -2.85 | 1.86061  | -5.301 | 0.000412 | 0.021   |
| AC091167.1 | -4.7  | -3.22897 | -5.237 | 0.000466 | 0.02336 |
| ZBTB7B     | -1.6  | 7.12405  | -5.236 | 0.000441 | 0.02228 |
| PHLDA3     | -1.76 | 4.5688   | -5.21  | 0.000455 | 0.0229  |
| FA2H       | -4.29 | -1.47431 | -5.193 | 0.000484 | 0.02377 |
| BBOX1      | -4.09 | 0.0109   | -5.175 | 0.000491 | 0.02395 |
| PARP4      | -1.61 | 4.74458  | -5.164 | 0.00048  | 0.02377 |
| ERFE       | -1.84 | 3.59921  | -5.158 | 0.000484 | 0.02377 |
| TRNP1      | -2.61 | 1.72401  | -5.158 | 0.000486 | 0.02378 |
| ITGA7      | -1.83 | 3.86166  | -5.158 | 0.000484 | 0.02377 |
| POU3F1     | -4.62 | -3.26672 | -5.15  | 0.000516 | 0.02489 |
| ADCY7      | -1.69 | 5.26439  | -5.133 | 0.000499 | 0.02425 |
| AC009690.3 | -4.91 | -3.11924 | -5.128 | 0.000535 | 0.02573 |
| ZNF385A    | -1.38 | 6.94269  | -5.109 | 0.000513 | 0.02484 |
| PCDH11Y    | -5.67 | -1.07169 | -5.078 | 0.000585 | 0.02769 |
| TRIM54     | -2.15 | 2.68799  | -5.019 | 0.000572 | 0.02734 |
| USP2       | -1.52 | 6.15709  | -4.993 | 0.00059  | 0.02783 |
| CXCL16     | -1.8  | 4.00093  | -4.961 | 0.000614 | 0.02885 |
| BACH2      | -3.25 | 0.83614  | -4.944 | 0.000636 | 0.02959 |
| MYOZ1      | -1.94 | 2.96726  | -4.905 | 0.000657 | 0.03039 |
| SETDB2     | -1.72 | 3.78448  | -4.836 | 0.000716 | 0.03256 |
| PRAM1      | -1.64 | 4.10672  | -4.825 | 0.000726 | 0.03289 |
| ENC1       | -1.91 | 4.62183  | -4.8   | 0.000749 | 0.03386 |
| GDF15      | -1.35 | 8.40371  | -4.788 | 0.00076  | 0.03422 |
| FAM84B     | -2.05 | 2.46536  | -4.785 | 0.000763 | 0.03424 |
| SLC27A3    | -1.71 | 3.98983  | -4.783 | 0.000765 | 0.03424 |
| GFI1       | -2.14 | 3.16329  | -4.775 | 0.000773 | 0.0345  |
| NTNG2      | -4.18 | -1.87912 | -4.767 | 0.000813 | 0.03593 |
| WNK2       | -3.05 | 0.40316  | -4.723 | 0.000833 | 0.0366  |
| NUP210     | -1.51 | 6.84835  | -4.702 | 0.000846 | 0.03707 |
| GPC3       | -2.01 | 2.80212  | -4.687 | 0.000863 | 0.03755 |
| KCNMA1     | -2.38 | 1.92417  | -4.66  | 0.000894 | 0.03869 |
| IGF2       | -4.21 | -3.04584 | -4.636 | 0.000961 | 0.04094 |
| FCER2      | -4.72 | -0.41162 | -4.635 | 0.00098  | 0.04138 |
| TACC2      | -1.54 | 4.95807  | -4.628 | 0.000929 | 0.03985 |
| ITM2B      | -1.46 | 7.7675   | -4.605 | 0.000957 | 0.0409  |
| TNNC2      | -3.98 | -1.63801 | -4.6   | 0.000998 | 0.04203 |
| PATJ       | -4.24 | -3.04545 | -4.598 | 0.00101  | 0.04228 |
| ARHGEF37   | -4.94 | -0.81449 | -4.594 | 0.001042 | 0.04285 |
| DLX4       | -3    | 0.17455  | -4.565 | 0.001017 | 0.04245 |
| HAVCR2     | -1.38 | 7.17233  | -4.563 | 0.001009 | 0.04228 |

|        |      |        |       |          |         |
|--------|------|--------|-------|----------|---------|
| KITLG  | 1.62 | 4.0182 | 4.454 | 0.001162 | 0.04616 |
| GPR183 | 1.57 | 4.3717 | 4.444 | 0.001177 | 0.04654 |
| ATP10A | 1.93 | 5.9472 | 4.384 | 0.001273 | 0.04963 |
|        |      |        |       |          |         |
|        |      |        |       |          |         |
|        |      |        |       |          |         |
|        |      |        |       |          |         |
|        |      |        |       |          |         |
|        |      |        |       |          |         |
|        |      |        |       |          |         |
|        |      |        |       |          |         |
|        |      |        |       |          |         |
|        |      |        |       |          |         |
|        |      |        |       |          |         |
|        |      |        |       |          |         |

|            |       |          |        |          |         |
|------------|-------|----------|--------|----------|---------|
| BIVM-ERCC5 | -2.16 | 3.08472  | -4.55  | 0.001028 | 0.04252 |
| IRS2       | -1.5  | 6.21863  | -4.541 | 0.001039 | 0.04285 |
| IGF2BP3    | -4.64 | -0.39451 | -4.54  | 0.001104 | 0.0448  |
| SHISA2     | -4.29 | -2.64019 | -4.501 | 0.001147 | 0.0457  |
| SLC29A1    | -1.47 | 5.14751  | -4.497 | 0.001099 | 0.0448  |
| RAB20      | -2.6  | 0.83776  | -4.496 | 0.001105 | 0.0448  |
| ARGLU1     | -1.52 | 5.29572  | -4.495 | 0.001101 | 0.0448  |
| SPNS3      | -2.31 | 1.7147   | -4.485 | 0.001118 | 0.04506 |
| DIRAS2     | -1.97 | 2.48334  | -4.468 | 0.001141 | 0.0457  |
| TBC1D10C   | -2.18 | 2.09796  | -4.465 | 0.001146 | 0.0457  |
| NOTCH3     | -2.88 | 0.29765  | -4.447 | 0.001182 | 0.04659 |
| NOXA1      | -2.23 | 1.73497  | -4.438 | 0.001188 | 0.04671 |
| LRP5       | -1.85 | 3.77912  | -4.408 | 0.001233 | 0.0482  |

**S3 Table. KEGG pathways enriched by the genes downregulated in the *RORA*-knockout**

| <b>ID</b> | <b>Pathway</b>                   | <b>N</b> | <b>Up</b> | <b>Down</b> | <b>P.Up</b> | <b>P.Down</b> |
|-----------|----------------------------------|----------|-----------|-------------|-------------|---------------|
| hsa03320  | PPAR signaling pathway           | 49       | 1         | 7           | 0.46        | 3E-06         |
| hsa04974  | Protein digestion and absorption | 51       | 3         | 7           | 0.026       | 4E-06         |
| hsa04512  | ECM-receptor interaction         | 60       | 3         | 7           | 0.040       | 1E-05         |
| hsa04979  | Cholesterol metabolism           | 33       | 0         | 5           | 1           | 7E-05         |
| hsa05200  | Pathways in cancer               | 412      | 16        | 15          | 7.E-05      | 0.0004        |
| hsa04725  | Cholinergic synapse              | 79       | 0         | 6           | 1           | 0.0006        |
| hsa04972  | Pancreatic secretion             | 53       | 0         | 5           | 1           | 0.0007        |
| hsa04971  | Gastric acid secretion           | 54       | 1         | 5           | 0.498       | 0.0007        |
| hsa04911  | Insulin secretion                | 54       | 1         | 5           | 0.49        | 0.0007        |
| hsa05165  | Human papillomavirus infection   | 273      | 5         | 11          | 0.26        | 0.001         |
